# Supplementary material for: Adsorption and co-adsorption mechanisms of p-nitrophenol and Pb(ii) on magnetic carbon aerogel in water
Source: Royal Society of Chemistry journal article supplement (doi:10.1039/d1ew00932j), 2022-01-01
Supplement: d1ew00932j1.pdf [file d1ew00932j1.pdf]

### Supplementary materials

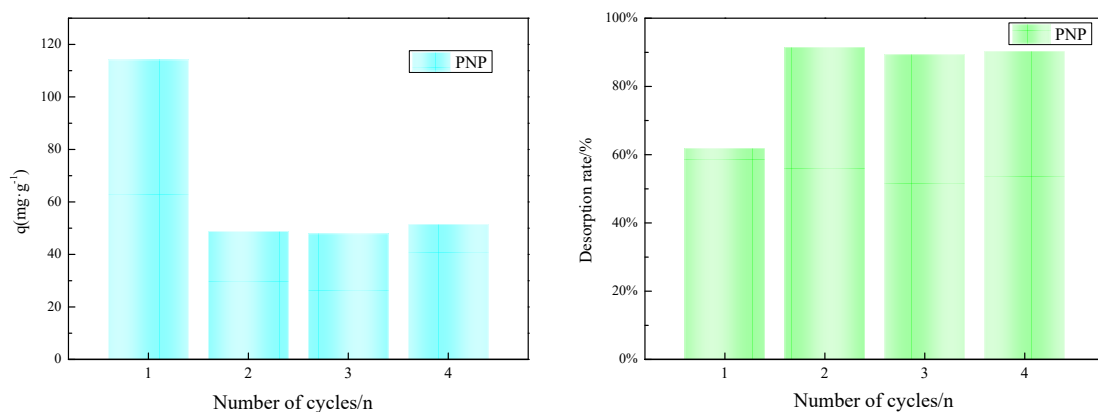

Fig. S1 Adsorption-desorption cycle experiments for PNP

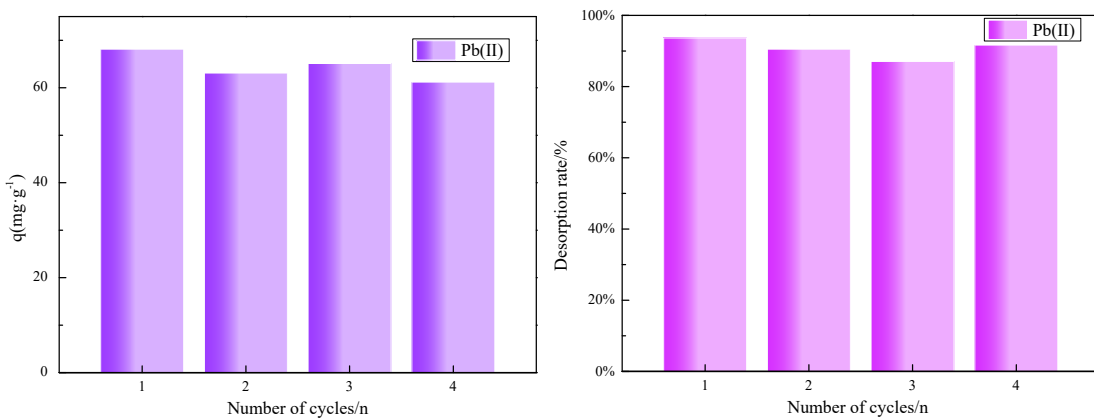

Fig. S2 Adsorption-desorption cycle experiment for Pb(II)

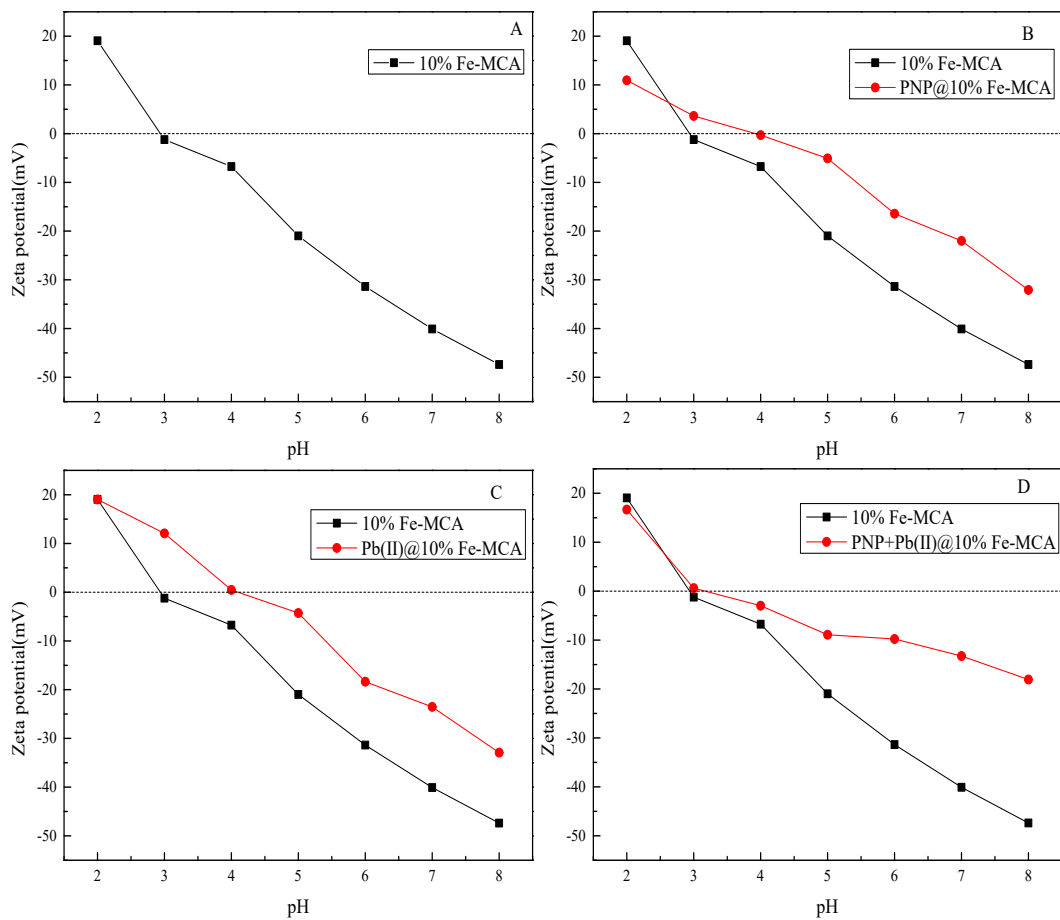

Fig. S3 Zeta potential diagram. A: Zeta potential diagram of 10% Fe-MCA; B: Zeta potential diagram of 10% Fe-MCA and PNP@10% Fe-MCA; C: Zeta potential diagram of 10% Fe-MCA and Pb(II)@10% Fe-MCA; D: Zeta potential diagram of 10% Fe-MCA and PNP+Pb(II)@10% Fe-MCA.

Table S1 Comparison of adsorption and magnetic performance of different adsorbents towards PNP and Pb(II)

| Materials     | $Q_{\max}$ PNP<br>( $\text{mg}\cdot\text{g}^{-1}$ ) | $Q_{\max}$ Pb(II)<br>( $\text{mg}\cdot\text{g}^{-1}$ ) | Number of<br>reuses | Magnetic<br>separation<br>or not | Ref.      |
|---------------|-----------------------------------------------------|--------------------------------------------------------|---------------------|----------------------------------|-----------|
| Fe/Zn-biochar | 170                                                 | 68                                                     | 0                   | yes                              | [1]       |
| 3D-GO-MA      | 44.8                                                | 84.8                                                   | 5                   | no                               | [2]       |
| N-Fe/OMC      | 230                                                 | 80                                                     | 0                   | yes                              | [3]       |
| GGTPCBD       | 59.0                                                | 701                                                    | 0                   | no                               | [4]       |
| GMN           | 19.4                                                | 14.9                                                   | 0                   | no                               | [5]       |
| 10% Fe-MCA    | 141                                                 | 66                                                     | 4                   | yes                              | This work |

## References

- [1] P. Wang, L. Tang, X. Wei, G.M. Zeng, Y.Y. Zhou, Y.C. Deng, J.J. Wang, Z.H. Xie, W. Fang, Synthesis and application of iron and zinc doped biochar for removal of p-nitrophenol in wastewater and assessment of the influence of co-existed Pb(II). *Appl. Surf. Sci.* 392 (2017) 391-401. <https://doi.org/10.1016/j.apsusc.2016.09.052>.
- [2] X.R. Zhao, X. Xu, J. Teng, N. Zhou, Z. Zhou, X.Y. Jiang, F.P. Jiao, J.P. Yu, Three-dimensional porous graphene oxide-maize amylopectin composites with controllable pore-sizes and good adsorption-desorption properties: Facile fabrication and reutilization, and the adsorption mechanism. *Ecotox. Environ. Safe.* 176 (2019) 11-19. <https://doi.org/10.1016/j.ecoenv.2019.03.069>.
- [3] Y.Y. Zhou, X.C. Liu, L. Tang, F.F. Zhang, G.M. Zeng, X.Q. Peng, L. Luo, Y.C. Deng, Y. Pang, J.C. Zhang, Insight into highly efficient co-removal of p-nitrophenol and lead by nitrogen-functionalized magnetic ordered mesoporous carbon: Performance and modelling. *J. Hazard. Mater.* 333 (2017) 80-87. <https://doi.org/10.1016/j.jhazmat.2017.03.031>.
- [4] M. Mitra, M. Mahapatra, A. Dutta, J.S.D. Roy, M. Karmakar, M. Deb, H. Mondal, P.K. Chattopadhyay, A. Bandyopadhyay, N.R. Singha, Carbohydrate and collagen-based doubly-grafted interpenetrating terpolymer hydrogel via N-H activated in situ allocation of monomer for superadsorption of Pb(II), Hg(II), dyes, vitamin-C, and p-nitrophenol. *J. Hazard. Mater.* 369 (2019) 746-762. <https://doi.org/10.1016/j.jhazmat.2018.12.019>.

[5]C.Y. Zhang, J.D. Luan, W. Chen, X. Ke, H.J. Zhang, Preparation of graphene oxide-montmorillonite nanocomposite and its application in multiple-pollutants removal from aqueous solutions. *Water. Sci. Technol.* 792 (2019) 323-333. <https://doi.org/10.2166/wst.2019.046>.

Table S2 Atomic ratio of different elements of adsorbents before and after adsorbing analytes

| Material         | C     | O     | N     | Pb    |
|------------------|-------|-------|-------|-------|
| MCA              | 87.6% | 11.3% | 1.04% | 0%    |
| MCA-PNP          | 81.5% | 16.5% | 2.00% | 0%    |
| MCA-Pb(II)       | 82.8% | 15.5% | 1.01% | 0.66% |
| MCA-(Pb(II)+PNP) | 84.3% | 13.4% | 1.81% | 0.49% |
